# Supplementary material
Source: publisher site journal article supplement (https://www.dovepress.com/article/353787)

**Supplementary Figure 1. Flowchart used for clinical determination of inheritance pattern, based on family history.**


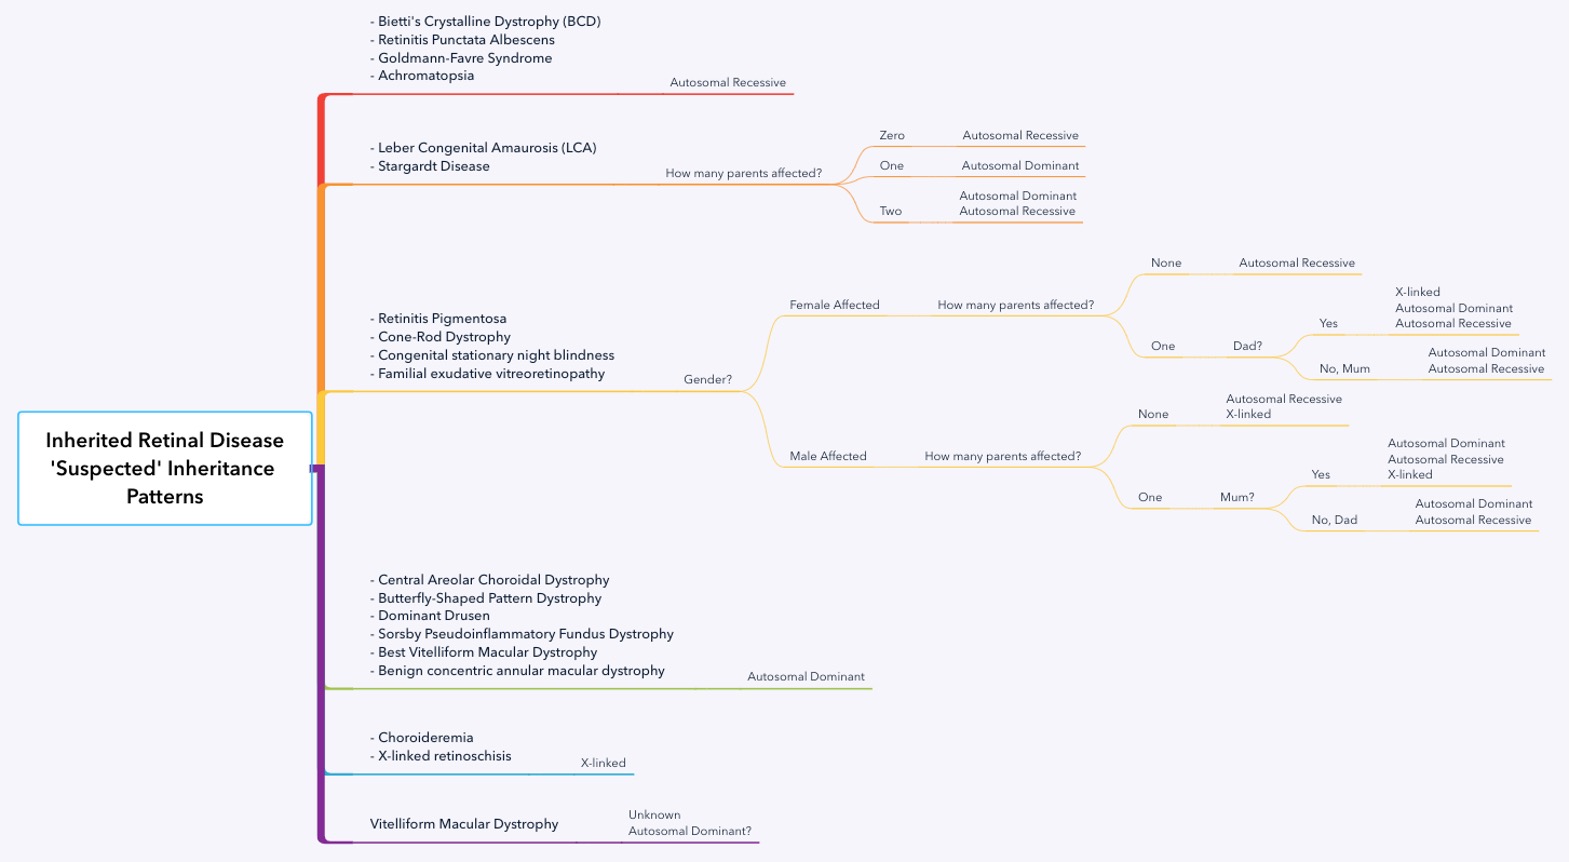

Supplement: Supplementary file 1 [file get_supplementary_file.php]
